# Supplementary material for: Intergrown SnO2–TiO2@graphene ternary composite as high-performance lithium-ion battery anodes
Source: Springer Nature journal article supplement (doi:10.1007/s11051-016-3617-5), 2016-10-01
Supplement: MOESM1 [file 10871824]

**Supporting Information**

**Intergrown SnO2-TiO2@graphene ternary composite as high-performance lithium-ion battery anodes**

Zheng Jiao,a Renmei Gao,a Haihua Tao,c Shuai Yuan,b Laiqiang Xu,a Saisai Xia,a and Haijiao Zhang***a

*aInstitute of Nanochemistry and Nanobiology, School of Environmental and Chemical Engineering, Shanghai University, Shanghai 200444, P. R. China*

*bResearch Center of Nanoscience and Nanotechnology, Shanghai University, Shanghai 200444, P. R. China*

*cInspection Center of Industrial Products&Raw Materials of SHCIQ, Shanghai 200331, P. R. China*

*Corresponding author:

E-mail: hjzhang128@shu.edu.cn


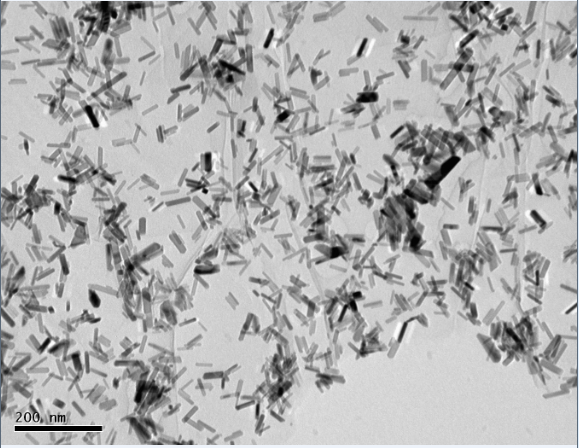


**Fig. S1** TEM image of SnO2@graphene.


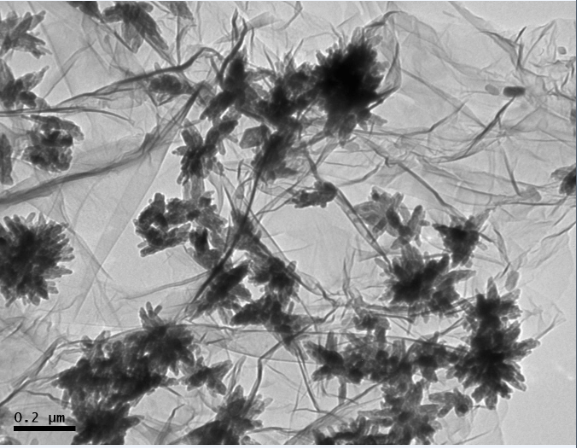


**Fig. S2** TEM image of TiO2@graphene.


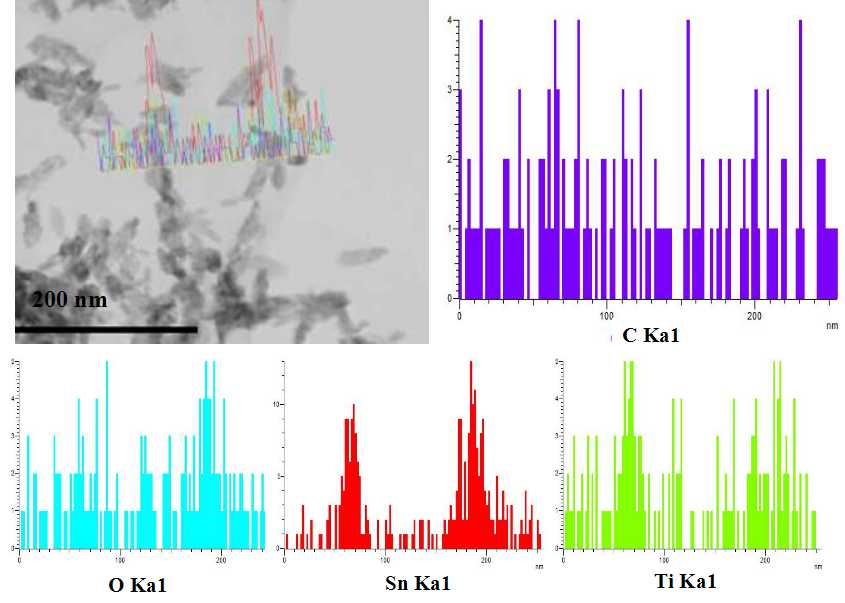


**Fig. S3** STEM image and elemental line profiles of SnO2-TiO2@graphene.


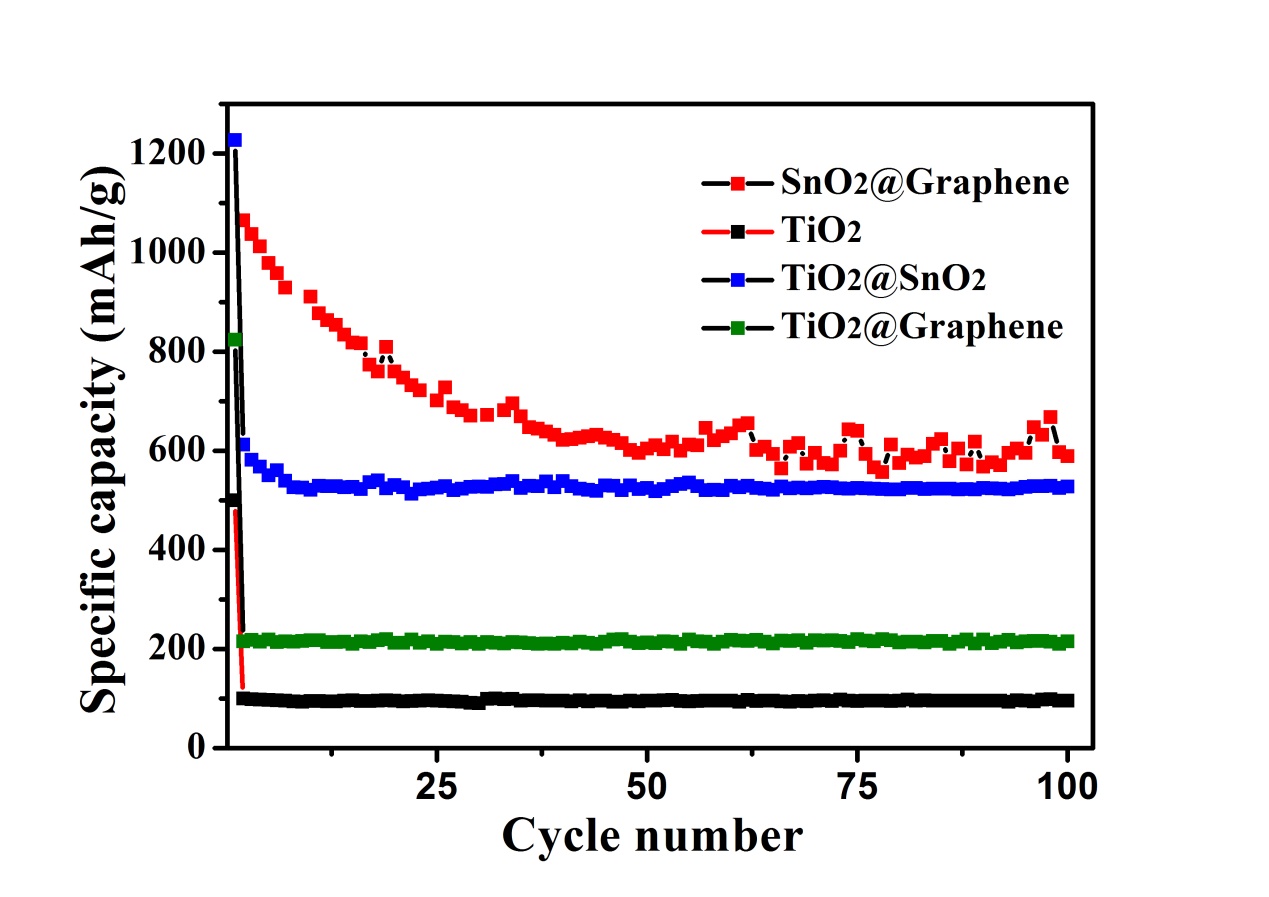


**Fig. S4** Thecycling performances of control samples at a current density of 200 mA/g between 1.0 and 3.0 V, respectively.

In order to better display the synergistic effect, the electrochemical performances of pure TiO2, SnO2@TiO2, SnO2@graphene and TiO2@graphene composites under the same test conditions are further provided in Fig. S4. Obviously, when used as the anode, the TiO2 material has a very good electrochemical stability for LIBs because of own advantage even after long-term cycles. Benefiting from the intrinsic property, the resulting other composites all show a good cycling stability. Moreover, compared with pure TiO2 nanoparticles, the discharge capacities of all the composites are also greatly improved due to the synergistic effect between TiO2 and other counterparts. In contrast, the obtained ternary SnO2-TiO2@graphene composite demonstrates an obviously enhanced lithium storage capability due to the effective synergistic effect among SnO2, TiO2 and graphene.


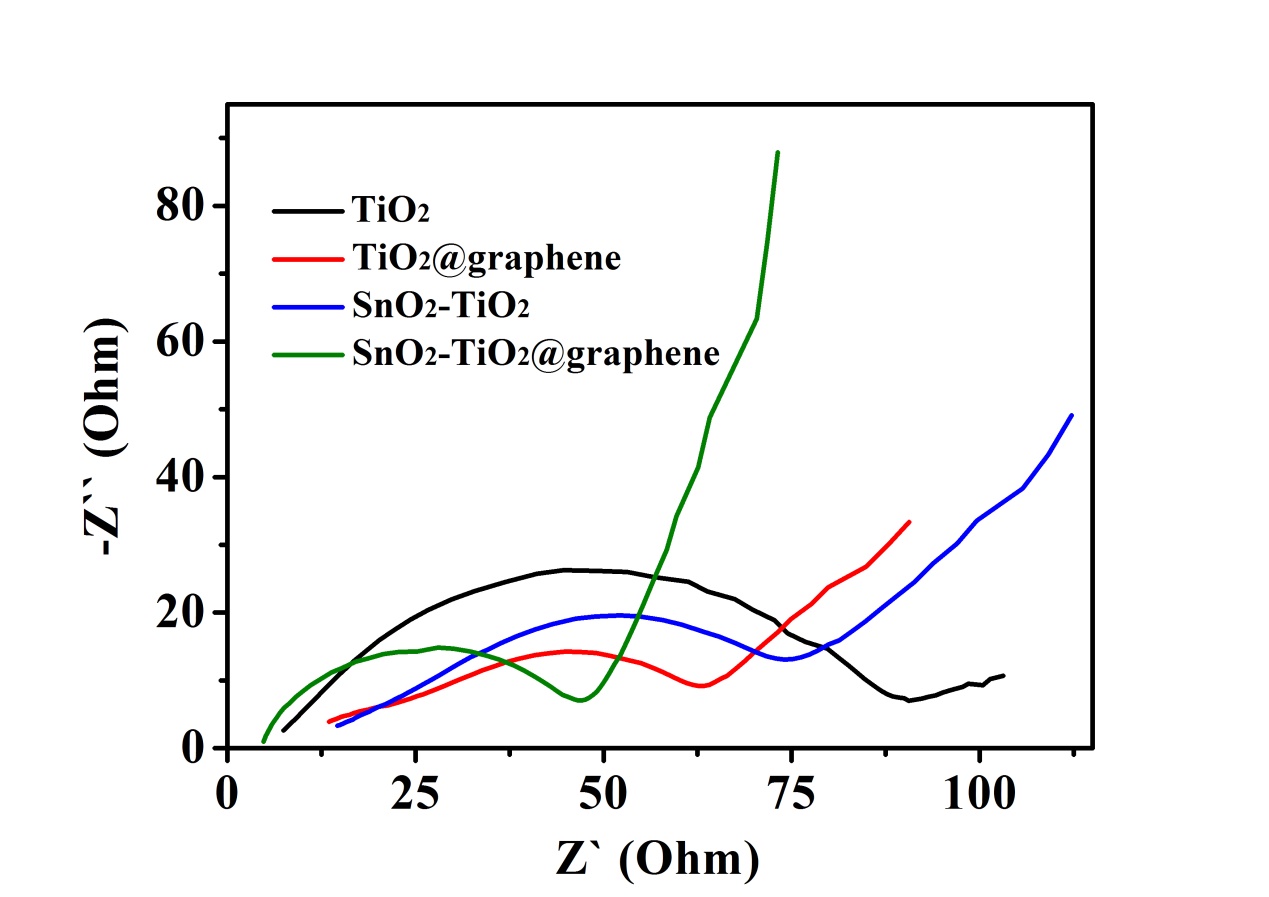


**Fig. S5** Nyquist plots of various electrode materials.
